# Supplementary material for: Crucial Role of Elovl6 in Chondrocyte Growth and Differentiation during Growth Plate Development in Mice
Source: PubMed Central journal article supplement (PMC4965081; doi:10.1371/journal.pone.0159375), 2016-07-28

# S1 Figure

**A**

Antisense

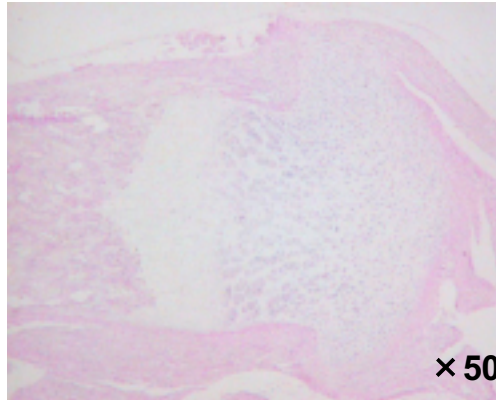

Sense

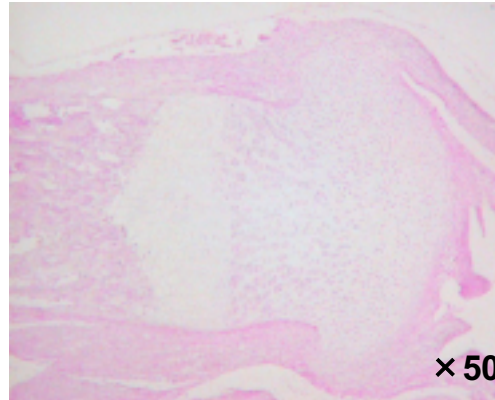

**B**

Relative Elov16 expression

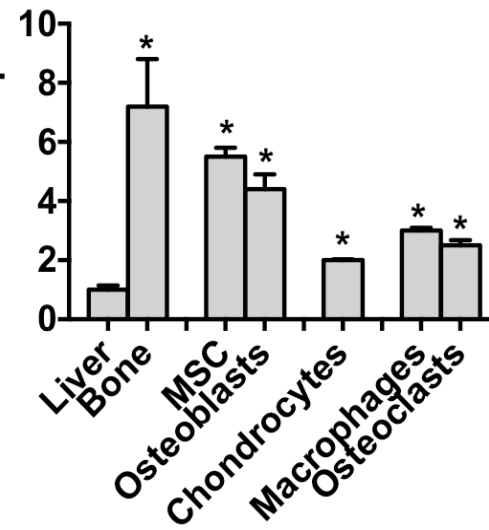

Supplement: pone.0159375.s001.pdf [file pone.0159375.s001.pdf]
