# Supplementary material for: Crucial Role of Elovl6 in Chondrocyte Growth and Differentiation during Growth Plate Development in Mice
Source: PubMed Central journal article supplement (PMC4965081; doi:10.1371/journal.pone.0159375), 2016-07-28

**S2 Figure**

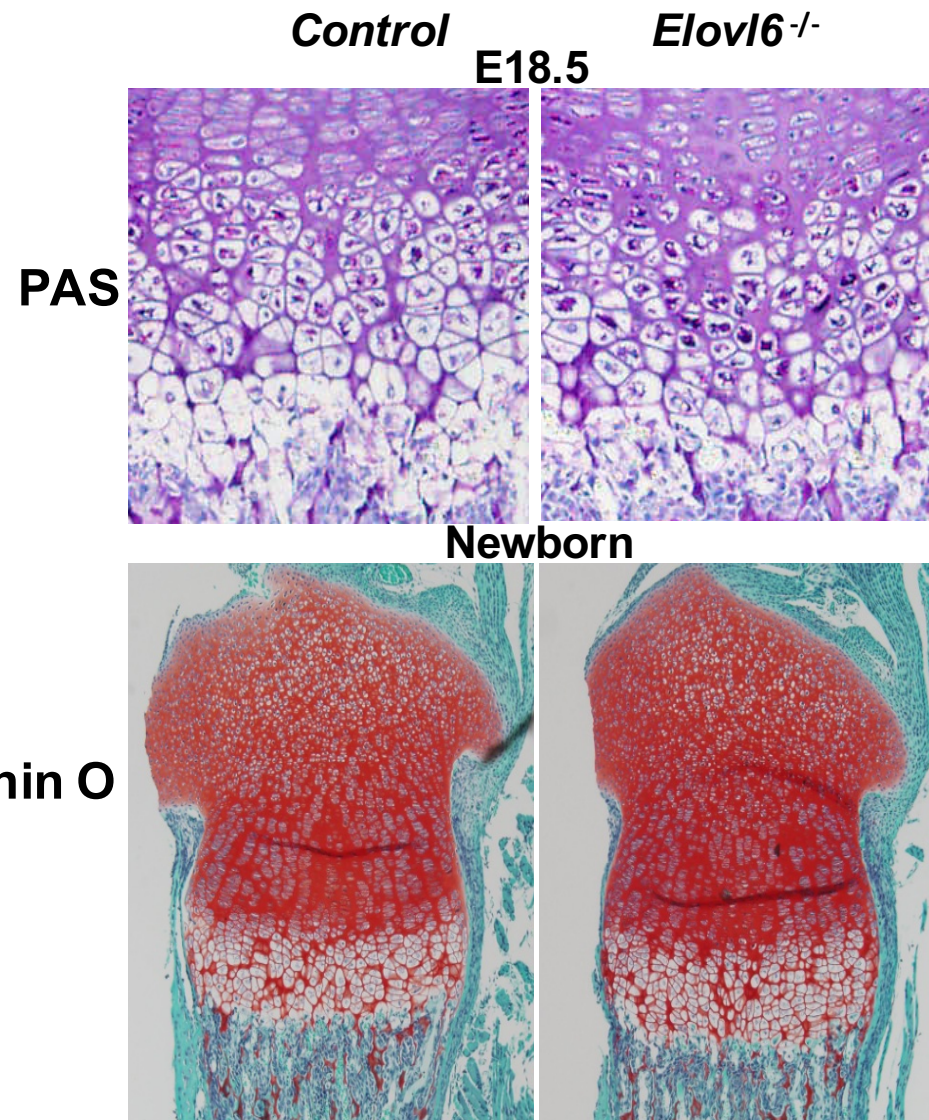

Supplement: pone.0159375.s002.pdf [file pone.0159375.s002.pdf]
