# Supplementary material for: Crucial Role of Elovl6 in Chondrocyte Growth and Differentiation during Growth Plate Development in Mice
Source: PubMed Central journal article supplement (PMC4965081; doi:10.1371/journal.pone.0159375), 2016-07-28

### S3 Figure

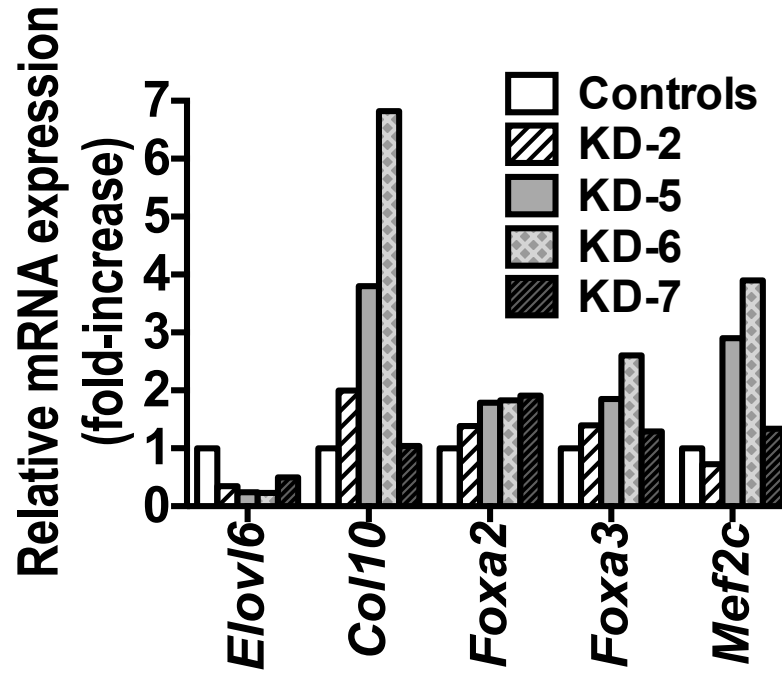

Supplement: pone.0159375.s003.pdf [file pone.0159375.s003.pdf]
